# Supplementary material for: A nested mechanistic sub-study into the effect of tranexamic acid versus placebo on intracranial haemorrhage and cerebral ischaemia in isolated traumatic brain injury: study protocol for a randomised controlled trial (CRASH-3 Trial Intracranial Bleeding Mechanistic Sub-Study [CRASH-3 IBMS])
Source: PubMed Central journal article supplement (PMC5513059; doi:10.1186/s13063-017-2073-6), 2017-07-17
Supplement: 13063_2017_2073_MOESM7_ESM.pdf [file 13063_2017_2073_MOESM7_ESM.pdf]

# London School of Hygiene & Tropical Medicine

(University of London)

## Clinical Trials Unit

Room 180, Keppel Street, London WC1E 7HT

Tel: +44(0)20 7299 4684 | Fax: +44(0)20 7299 4663

Email: [ctu@Lshhtm.ac.uk](mailto:ctu@Lshhtm.ac.uk)

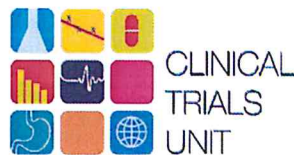

LONDON  
SCHOOL of  
HYGIENE  
& TROPICAL  
MEDICINE

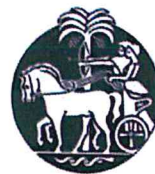

20 December 2016

To whom it may concern,

I am writing to confirm that the London School of Hygiene and Tropical Medicine is partly funding the CRASH-3 study and is fully funding the CRASH-3 sub-study–

|                  |                                              |
|------------------|----------------------------------------------|
| Name of trial:   | CRASH-3                                      |
| Name of funder:  | London School of Hygiene & Tropical Medicine |
| Grant reference: | EPNPBH61                                     |
| Funding amount:  | £433,276                                     |

|                  |                                              |
|------------------|----------------------------------------------|
| Name of trial:   | CRASH-3 sub-study                            |
| Name of funder:  | London School of Hygiene & Tropical Medicine |
| Grant reference: | EPAA6020                                     |
| Funding amount:  | £65,000                                      |

Yours sincerely,

A handwritten signature in blue ink that reads "Courtenay Howe".

Courtenay Howe  
Clinical Trials Unit Administrator
