# Supplementary material for: A nested mechanistic sub-study into the effect of tranexamic acid versus placebo on intracranial haemorrhage and cerebral ischaemia in isolated traumatic brain injury: study protocol for a randomised controlled trial (CRASH-3 Trial Intracranial Bleeding Mechanistic Sub-Study [CRASH-3 IBMS])
Source: Trials. 2017 Jul 17;18:330. doi: 10.1186/s13063-017-2073-6 (PMC5513059; doi:10.1186/s13063-017-2073-6)
Supplement: Supplementary file 5 — Confirmation of funding for the CRASH-3 trial from the Joint Global Health Trials Scheme. (PDF 137 kb) [file 13063_2017_2073_MOESM5_ESM.pdf]

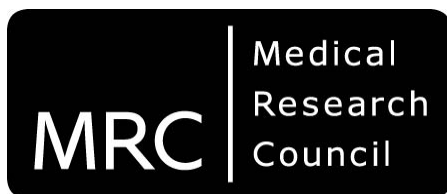

## Medical Research Council

2nd Floor David Phillips Building, Polaris House, North Star

Avenue, Swindon,

United Kingdom SN2 1ET

Telephone +44 (0) 1793 416200

Web <http://www.mrc.ac.uk/>

---

### COMPLIANCE WITH THE DATA PROTECTION ACT 1998

In accordance with the Data Protection Act 1998, the personal data provided on this form will be processed by MRC, and may be held on computerised database and/or manual files. Further details may be found in the **guidance notes**

---

# OFFER ACCEPTANCE

Document Status: With Submitter

MRC Reference: MR/M009211/1

## Offer Acceptance Details

|                        |                                                                                             |
|------------------------|---------------------------------------------------------------------------------------------|
| Grant Reference:       | MR/M009211/1                                                                                |
| Grant Holder:          | Professor Ian Gray Roberts                                                                  |
| Grant Title:           | The CRASH-3 Trial: Tranexamic acid for the treatment of significant traumatic brain injury. |
| Organisation:          | London Sch of Hygiene and Trop Medicine                                                     |
| RO Proposal Reference: | MR/L020890/1                                                                                |
| Announced Start Date:  | 1 November 2014                                                                             |
| Announced End Date:    | 31 July 2018                                                                                |
| Earliest Start Date:   | 1 November 2014                                                                             |
| Latest Start Date:     | 1 February 2015                                                                             |
| Document Name:         | Offer Acceptance                                                                            |
| Document Description:  | Re-announcement                                                                             |
| Document Expiry Date:  | 27 November 2014                                                                            |

## Reissue Details

|                    |                  |
|--------------------|------------------|
| Date of Reissue    | 13 November 2014 |
| Reason for Reissue | grant offer      |

# Combined Funding Streams

|                        |                                                                                               |                |                                      |
|------------------------|-----------------------------------------------------------------------------------------------|----------------|--------------------------------------|
| Grant Reference        | : MR/M009211/1                                                                                | Start Date     | : 01 Nov 2014                        |
| Organisation           | : London Sch of Hygiene and Trop Medicine                                                     | End Date       | : 31 Jul 2018                        |
| Organisation Reference | : MR/L020890/1                                                                                | Department     | : Epidemiology and Population Health |
| Grant Holder           | : Professor Ian Gray Roberts                                                                  | Grant Status   | : Authorised                         |
| Grant Title            | : The CRASH-3 Trial: Tranexamic acid for the treatment of significant traumatic brain injury. | Funding Stream | : Combined Funding Streams           |

Issue Date: 13 Nov 2014      Issue Reason: Grant Offer

|             | Directly Incurred |                        |             | Directly Allocated |              | Indirect Costs | Exceptions |             |               |        |
|-------------|-------------------|------------------------|-------------|--------------------|--------------|----------------|------------|-------------|---------------|--------|
| Description | Staff             | Travel and Subsistence | Other Costs | Investigators      | Estate Costs | Indirect Costs | Staff      | Other Costs | Payment Total | Status |
| 2014/15 Q3  | £36,781.89        | £10,941.24             | £13,413.67  | £5,261.79          | £1,982.21    | £16,408.58     | £2,661.39  | £54,827.33  | £142,278.10   | Due    |
| 2014/15 Q4  | £36,781.89        | £10,941.24             | £13,413.67  | £5,261.79          | £1,982.21    | £16,408.58     | £2,661.39  | £54,827.33  | £142,278.10   | Due    |
| 2015/16 Q1  | £36,781.89        | £10,941.24             | £13,413.67  | £5,261.79          | £1,982.21    | £16,408.58     | £2,661.39  | £54,827.33  | £142,278.10   | Due    |
| 2015/16 Q2  | £36,781.89        | £10,941.24             | £13,413.67  | £5,261.79          | £1,982.21    | £16,408.58     | £2,661.39  | £54,827.33  | £142,278.10   | Due    |
| 2015/16 Q3  | £37,079.81        | £11,029.87             | £13,522.32  | £5,304.42          | £1,998.26    | £16,541.49     | £2,682.95  | £55,271.43  | £143,430.55   | Due    |
| 2015/16 Q4  | £37,079.81        | £11,029.87             | £13,522.32  | £5,304.42          | £1,998.26    | £16,541.49     | £2,682.95  | £55,271.43  | £143,430.55   | Due    |
| 2016/17 Q1  | £37,079.81        | £11,029.87             | £13,522.32  | £5,304.42          | £1,998.26    | £16,541.49     | £2,682.95  | £55,271.43  | £143,430.55   | Due    |
| 2016/17 Q2  | £37,079.81        | £11,029.87             | £13,522.32  | £5,304.42          | £1,998.26    | £16,541.49     | £2,682.95  | £55,271.43  | £143,430.55   | Due    |
| 2016/17 Q3  | £37,380.19        | £11,119.21             | £13,631.85  | £5,347.39          | £2,014.45    | £16,675.48     | £2,704.68  | £55,719.13  | £144,592.38   | Due    |
| 2016/17 Q4  | £37,380.19        | £11,119.21             | £13,631.85  | £5,347.39          | £2,014.45    | £16,675.48     | £2,704.68  | £55,719.13  | £144,592.38   | Due    |
| 2017/18 Q1  | £37,380.19        | £11,119.21             | £13,631.85  | £5,347.39          | £2,014.45    | £16,675.48     | £2,704.68  | £55,719.13  | £144,592.38   | Due    |
| 2017/18 Q2  | £37,380.19        | £11,119.21             | £13,631.85  | £5,347.39          | £2,014.45    | £16,675.48     | £2,704.68  | £55,719.13  | £144,592.38   | Due    |
| 2017/18 Q3  | £37,682.94        | £11,209.27             | £13,742.27  | £5,390.70          | £2,030.77    | £16,810.55     | £2,726.59  | £56,170.46  | £145,763.55   | Due    |
| 2017/18 Q4  | £37,682.94        | £11,209.27             | £13,742.27  | £5,390.70          | £2,030.77    | £16,810.55     | £2,726.59  | £56,170.46  | £145,763.55   | Due    |
| 2018/19 Q1  | £37,682.83        | £11,209.33             | £13,742.28  | £5,390.64          | £2,030.75    | £16,810.62     | £2,726.59  | £56,170.46  | £145,763.50   | Due    |

|               |               |
|---------------|---------------|
| Paid to Date: | £0.00         |
| Outstanding:  | £2,158,494.72 |
| SubTotal:     | £2,158,494.72 |
| Grand Total:  | £2,158,494.72 |

**Organisation:** London Sch of Hygiene and Trop Medicine

**Grant Holder:** Professor Ian Roberts

**Grant Title:** The CRASH-3 Trial: Tranexamic acid for the treatment of significant traumatic brain injury.

**Starts:** 1 November 2014

**Ends:** 31 July 2018

**Duration:** 45

## GRANT VALUE

### Funds Awarded

|                             | Authorised FEC<br>(£) |               |                  | RC Contribution<br>(£) |               |                  | % FEC |
|-----------------------------|-----------------------|---------------|------------------|------------------------|---------------|------------------|-------|
|                             | net                   | Indexation    | Total            | net                    | Indexation    | Total            |       |
| DI - Staff                  | 739,588               | 14,488        | 754,076          | 547,295                | 10,721        | 558,016          | 74    |
| DI - T&S                    | 220,000               | 4,310         | 224,310          | 162,800                | 3,189         | 165,989          | 74    |
| DI - Other Costs            | 269,714               | 5,284         | 274,998          | 199,588                | 3,910         | 203,498          | 74    |
| DA - Investigators          | 105,801               | 2,073         | 107,874          | 78,293                 | 1,534         | 79,826           | 74    |
| DA - Estate Costs           | 39,857                | 781           | 40,638           | 29,494                 | 578           | 30,072           | 74    |
| Indirect - Indirect Costs   | 329,934               | 6,463         | 336,397          | 244,151                | 4,783         | 248,934          | 74    |
| Exception - Staff           | 39,600                | 776           | 40,376           | 39,600                 | 776           | 40,376           | 100   |
| Exception - Other Costs     | 815,802               | 15,981        | 831,783          | 815,802                | 15,981        | 831,783          | 100   |
| <b>Total Value of Award</b> | <b>2,560,296</b>      | <b>50,154</b> | <b>2,610,450</b> | <b>2,117,024</b>       | <b>41,471</b> | <b>2,158,495</b> |       |

### Cost of Access to Facilities

(Funds not awarded to Grant Holding Organisation)

0

## STAFF

### Staff Summary

|              | Authorised FEC<br>net | RC Contribution<br>net | Number Of Staff<br>Months |
|--------------|-----------------------|------------------------|---------------------------|
| Investigator | 165,701               | 132,915                | 32                        |
| Other        | 558,336               | 413,169                | 274                       |
| Researcher   | 160,952               | 119,104                | 50                        |

### Staff and DI Investigator Details

| Start Date      | End Date     | Duration | FTE<br>Percent | Name or Post<br>Identifier | Summary Fund<br>Heading | Authorised Cost<br>(Excluding Indexation) |
|-----------------|--------------|----------|----------------|----------------------------|-------------------------|-------------------------------------------|
| 1 November 2014 | 31 July 2018 | 45       | 1              | Mr A Belli                 | Directly Incurred       | 6660.00                                   |
| 1 November 2014 | 31 July 2018 | 45       | 8              | Professor R<br>CHAUDHRI    | Exception               | 15840.00                                  |
| 1 November 2014 | 31 July 2018 | 45       | 10             | Dr PJ Edwards              | Directly Incurred       | 30610.00                                  |
| 1 November 2014 | 31 July 2018 | 45       | 5              | Dr A Fawole                | Exception               | 9900.00                                   |
| 1 November 2014 | 31 July 2018 | 45       | 1              | Professor T R E<br>Harris  | Directly Incurred       | 5896.00                                   |
| 1 November 2014 | 31 July 2018 | 45       | 2              | Professor R Joorna         | Exception               | 3960.00                                   |
| 1 November 2014 | 31 July 2018 | 45       | 5              | Ms K Ker                   | Directly Incurred       | 7744.00                                   |
| 1 November 2014 | 31 July 2018 | 45       | 5              | Professor MT<br>Shokunbi   | Exception               | 9900.00                                   |
