# Supplementary material for: A nested mechanistic sub-study into the effect of tranexamic acid versus placebo on intracranial haemorrhage and cerebral ischaemia in isolated traumatic brain injury: study protocol for a randomised controlled trial (CRASH-3 Trial Intracranial Bleeding Mechanistic Sub-Study [CRASH-3 IBMS])
Source: Trials. 2017 Jul 17;18:330. doi: 10.1186/s13063-017-2073-6 (PMC5513059; doi:10.1186/s13063-017-2073-6)
Supplement: Supplementary file 9 — Letter of favourable ethical opinion from the Observational/Interventions Research Ethics Committee at the London School of Hygiene and Tropical Medicine. (PDF 267 kb) [file 13063_2017_2073_MOESM9_ESM.pdf]

## London School of Hygiene & Tropical Medicine

Keppel Street, London WC1E 7HT  
United Kingdom  
Switchboard: +44 (0)20 7636 8636

[www.lshtm.ac.uk](http://www.lshtm.ac.uk)

LONDON  
SCHOOL of  
HYGIENE  
& TROPICAL  
MEDICINE

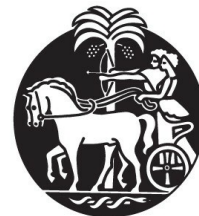

### Observational / Interventions Research Ethics Committee

Miss Danielle Beaumont  
LSHTM

24 May 2016

Dear Danielle

**Study Title:** CRASH-3 Trial: CT Scan Sub study

**LSHTM Ethics Ref:** 11535

Thank you for your application for the above research project which has now been considered by the Interventions Committee via Chair's Action.

#### Confirmation of ethical opinion

On behalf of the Committee, I am pleased to confirm a favourable ethical opinion for the above research on the basis described in the application form, protocol and supporting documentation, subject to the conditions specified below.

#### Conditions of the favourable opinion

Approval is dependent on local ethical approval having been received, where relevant.

#### Approved documents

The final list of documents reviewed and approved is as follows:

| Document Type       | File Name                                                     | Date       | Version |
|---------------------|---------------------------------------------------------------|------------|---------|
| Sponsor Letter      | LSHTM sponsorship confirmation 21oct11                        | 21/10/2011 | 1.0     |
| Other               | DMC charter final 0.2_14 Jun12                                | 14/06/2012 | 0.2     |
| Information Sheet   | Information sheet for patient & representative UK Version 1.1 | 19/07/2012 | 1.1     |
| Information Sheet   | Consent form for patient & representative UK Version 1.1      | 19/07/2012 | 1.1     |
| Local Approval      | 12-EE-0274 favourable opinion_APPROVAL                        | 19/07/2012 | 1.0     |
| Safety Information  | 02 SmPC updated 29 November 2012                              | 29/11/2012 | 1.0     |
| Protocol / Proposal | C3 CTscan_Protocol version FINAL                              | 16/03/2016 | 1.0     |
| Investigator CV     | CV_Abda Mahmood                                               | 25/04/2016 | Final   |
| Investigator CV     | CV_Ian Roberts                                                | 25/04/2016 | Final   |
| Investigator CV     | CV_Haleema Shakur                                             | 25/04/2016 | Final   |
| Covering Letter     | 1 Ethics Submission Response_FINAL                            | 17/05/2016 | 1.0     |

#### After ethical review

The Chief Investigator (CI) or delegate is responsible for informing the ethics committee of any subsequent changes to the application. These must be submitted to the committee for review using an Amendment form. Amendments must not be initiated before receipt of written favourable opinion from the committee.

The CI or delegate is also required to notify the ethics committee of any protocol violations and/or Suspected Unexpected Serious Adverse Reactions (SUSARs) which occur during the project by submitting a Serious Adverse Event form.

An annual report should be submitted to the committee using an Annual Report form on the anniversary of the approval of the study during the lifetime of the study.

At the end of the study, the CI or delegate must notify the committee using the End of Study form.

All aforementioned forms are available on the ethics online applications website and can only be submitted to the committee via the website at: <http://leo.lshtm.ac.uk>.

Further information is available at: [www.lshtm.ac.uk/ethics](http://www.lshtm.ac.uk/ethics).

Yours sincerely,

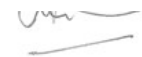

Professor John DH Porter  
Chair

[ethics@lshtm.ac.uk](mailto:ethics@lshtm.ac.uk)  
<http://www.lshtm.ac.uk/ethics/>

---

Improving health worldwide
